# Supplementary material
Source: PubMed Central journal article supplement (PMC6642676)
Supplement: NIHMS1036541-supplement-Supplementary_data.pdf [file NIHMS1036541-supplement-Supplementary_data.pdf]

**Supplementary Table 1: Serum levels of vitamins, nutritional markers and biomarkers in chronic pancreatitis patients, stratified by PERT usage**

| Variable (reference range)                      | Chronic Pancreatitis patients |                      | p-value* |
|-------------------------------------------------|-------------------------------|----------------------|----------|
|                                                 | PERT use No (135)             | PERT use Yes (166)   |          |
| Vitamin A (30-105 µg/dL)                        | 36.6 [26.0, 50.5]             | 43.3 [34.6, 54.1]    | 0.04     |
| Vitamin B12 (cobalamin) (210-911 pg/mL)         | 717.0 [562.5, 918.0]          | 685.5 [568.5, 918.8] | 0.87     |
| Vitamin D (25-hydroxy vitamin D3) (10-55 ng/mL) | 21.0 [11.8, 31.8]             | 20.3 [10.9, 34.3]    | 0.87     |
| Vitamin E (α-tocopherol) (5.7-19.9 mg/L)        | 8.6 [6.6, 12.2]               | 8.8 [6.3, 12.2]      | 0.87     |
| Vitamin E (γ -tocopherol) ( ≤4.3 mg/L)          | 1.8 [1.1, 2.8]                | 1.8 [1.1, 2.8]       | 0.87     |
| Osteocalcin (9-42 ng/mL)                        | 7.9 [5.3, 12.6]               | 7.9 [4.9, 12.2]      | 0.87     |
| Prealbumin (transthyretin) (15-36 mg/dL)        | 22.0 [15.5, 26.0]             | 24.0 [20.0, 28.0]    | 0.015    |
| Retinol Binding Protein (15-67 µg/mL)           | 32.5 [22.9, 40.2]             | 36.3 [28.7, 46.6]    | 0.051    |
| C-reactive protein (CRP) (<0.7 mg/dL)           | 0.4 [0.1, 1.4]                | 0.3 [0.1, 0.8]       | 0.37     |
| TNF-α (pg/mL)**                                 | 3.0 [2.0, 4.0]                | 3.0 [2.0, 3.0]       | 0.30     |

Values are shown as median and interquartile range

\*Adjusted for multiple comparisons using Hommel's procedure

\*\* TNF-α does not have a standard reference range

**Supplementary Table 2: Serum levels of vitamins, nutritional markers and biomarkers in chronic pancreatitis patients, stratified by use of vitamin supplements**

| Variable (reference range)                      | Chronic Pancreatitis patients |                               | p-value* |
|-------------------------------------------------|-------------------------------|-------------------------------|----------|
|                                                 | Vitamin supplements No (132)  | Vitamin supplements Yes (168) |          |
| Vitamin A (30-105 µg/dL)                        | 38.3 [26.9, 48.1]             | 45.0 [32.9, 56.1]             | 0.021    |
| Vitamin B12 (cobalamin) (210-911 pg/mL)         | 649.0 [526.8, 835.0]          | 756.5 [588.5, 949.8]          | 0.046    |
| Vitamin D (25-hydroxy vitamin D3) (10-55 ng/mL) | 18.9 [10.7, 29.6]             | 22.2 [12.7, 34.8]             | 0.17     |
| Vitamin E (α-tocopherol) (5.7-19.9 mg/L)        | 8.0 [6.2, 11.0]               | 9.5 [6.9, 13.3]               | 0.02     |
| Vitamin E (γ -tocopherol) ( ≤4.3 mg/L)          | 2.2 [1.5, 3.2]                | 1.6 [1.0, 2.3]                | < 0.001  |
| Osteocalcin (9-42 ng/mL)                        | 7.4 [4.9, 11.0]               | 8.7 [5.2, 14.3]               | 0.21     |
| Prealbumin (transthyretin) (15-36 mg/dL)        | 23.0 [17.8, 27.0]             | 24.0 [19.0, 28.0]             | 0.31     |
| Retinol Binding Protein (15-67 µg/mL)           | 32.2 [23.4, 39.1]             | 36.3 [28.4, 46.5]             | 0.03     |
| C-reactive protein (CRP) (<0.7 mg/dL)           | 0.4 [0.1, 1.3]                | 0.3 [0.1, 0.9]                | 0.31     |
| TNF-α (pg/mL)**                                 | 3.0 [2.0, 3.0]                | 3.0 [2.0, 4.0]                | 0.31     |

Values are shown as median and interquartile range

\*Adjusted for multiple comparisons using Hommel's procedure

\*\* TNF-α does not have a standard reference range

**Supplementary Table 3: Serum levels of vitamins, nutritional markers and biomarkers in controls, stratified by use of vitamin supplements**

| Variable (reference range)                      | Controls                     |                               | p-value* |
|-------------------------------------------------|------------------------------|-------------------------------|----------|
|                                                 | Vitamin supplements No (145) | Vitamin supplements Yes (120) |          |
| Vitamin A (30-105 µg/dL)                        | 44.0 [36.7, 51.2]            | 47.9 [38.9, 60.4]             | 0.048    |
| Vitamin B12 (cobalamin) (210-911 pg/mL)         | 587.0 [446.0, 741.0]         | 653.0 [516.5, 867.3]          | 0.03     |
| Vitamin D (25-hydroxy vitamin D3) (10-55 ng/mL) | 16.1 [9.8, 27.1]             | 27.2 [20.0, 36.8]             | < 0.001  |
| Vitamin E (α-tocopherol) (5.7-19.9 mg/L)        | 9.7 [7.8, 11.2]              | 11.6 [9.4, 13.7]              | < 0.001  |
| Vitamin E (γ -tocopherol) (≤4.3 mg/L)           | 2.4 [1.9, 3.3]               | 2.0 [1.4, 2.7]                | 0.002    |
| Osteocalcin (9-42 ng/mL)                        | 10.0 [7.4, 14.2]             | 9.9 [7.0, 14.5]               | 0.73     |
| Prealbumin (transthyretin) (15-36 mg/dL)        | 26.0 [23.0, 29.0]            | 27.0 [23.0, 31.0]             | 0.73     |
| Retinol Binding Protein (15-67 µg/mL)           | 36.7 [28.9, 43.2]            | 38.0 [30.4, 47.0]             | 0.71     |
| C-reactive protein (CRP) (<0.7 mg/dL)           | 0.2 [0.1, 0.6]               | 0.2 [0.1, 0.4]                | 0.73     |
| TNF-α (pg/mL)**                                 | 3.0 [2.0, 3.0]               | 3.0 [2.0, 3.0]                | 0.73     |

Values are shown as median and interquartile range

\*Adjusted for multiple comparisons using Hommel's procedure

\*\* TNF-α does not have a standard reference range

**Supplemental Table 4: Multivariable linear regression analyses for predictors of serum levels of vitamins, nutritional markers and biomarkers in CP Patients**

|                                        | Vitamin A | Vitamin B12 | Vitamin D3 | Vitamin E $\alpha$ Tocopherol | Vitamin E $\gamma$ Tocopherol | Osteocalcin | Pre-albumin | Retinol Binding Protein | C reactive protein | TNF $\alpha$ |
|----------------------------------------|-----------|-------------|------------|-------------------------------|-------------------------------|-------------|-------------|-------------------------|--------------------|--------------|
| (Intercept)                            | 3.543 ‡   | 6.522 ‡     | 2.943 ‡    | 2.168 ‡                       | 1.379 ‡                       | 1.962 ‡     | 3.012 ‡     | 3.409 ‡                 | -1.508 ‡           | 1.608 ‡      |
| Race ( <i>African-American</i> )       | -0.223 ‡  |             | -0.445 ‡   | -0.149 *                      |                               |             |             | -0.133 *                | 0.611 †            | 0.253 ^      |
| Sex ( <i>male</i> )                    |           |             |            | -0.130 *                      |                               |             |             |                         |                    |              |
| Age ( <i>centered</i> )                |           |             |            | 0.007 †                       |                               |             |             | 0.004 *                 | 0.016 *            |              |
| Vitamin Supplementation ( <i>yes</i> ) | 0.185 †   | 0.117 *     |            | 0.164 †                       | -0.158 †                      | 0.169 ^     |             | 0.134 *                 |                    | 0.191        |
| PERT ( <i>yes</i> )                    | 0.147 †   |             |            |                               |                               |             | 0.177 ‡     | 0.121 *                 | -0.387 *           |              |
| Diabetes ( <i>yes</i> )                |           |             |            |                               |                               |             | -0.148 †    |                         |                    |              |
| Current BMI                            |           |             |            |                               |                               |             |             |                         |                    |              |
| <i>Underweight</i>                     |           |             |            |                               | 0.054                         |             |             |                         | -0.644 ^           |              |
| <i>Overweight</i>                      |           |             |            |                               | 0.222 †                       |             |             |                         | 0.142              |              |
| <i>Obese</i>                           |           |             |            |                               | 0.313 ‡                       |             |             |                         | 0.796 †            |              |
| Alcohol consumption                    |           |             |            |                               |                               |             |             |                         |                    |              |
| <i>Former</i>                          |           |             | 0.201      |                               | -0.223 *                      |             | 0.102       |                         |                    |              |
| <i>Current</i>                         |           |             | 0.268 ^    |                               | -0.235 *                      |             | 0.180 *     |                         |                    |              |
| Smoking status                         |           |             |            |                               |                               |             |             |                         |                    |              |
| <i>Former</i>                          |           |             | 0.207      |                               | 0.187 *                       |             | -0.085      |                         | -0.087             |              |
| <i>Current</i>                         |           |             | -0.242 *   |                               | 0.254 ‡                       |             | -0.121      |                         | 0.396              |              |

^  $p < 0.10$  \*  $p < 0.05$  †  $p < 0.01$  ‡  $p < 0.001$

All serum levels underwent log transformation prior to modeling except for Vitamin E  $\gamma$  Tocopherol and TNF  $\alpha$ , which were transformed using a square root function.
